# Supplementary material
Source: Springer Nature journal article supplement (https://www.springermedizin.de/resource/supplementary/12889_2009_2169_MOESM10_ESM.pdf/9484826)
Supplement: MOESM10 [file 9484826]

**A.**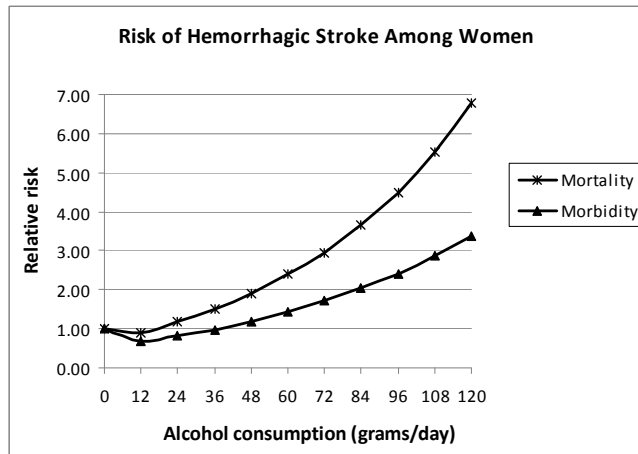

Mortality: J-shaped dose-response,  $f(\beta_1 \log(x) + \beta_2 x)$

Morbidity: J-shaped dose-response,  $f(\beta_1 x^5 + \beta_2 x^5 \log(x))$

**B.**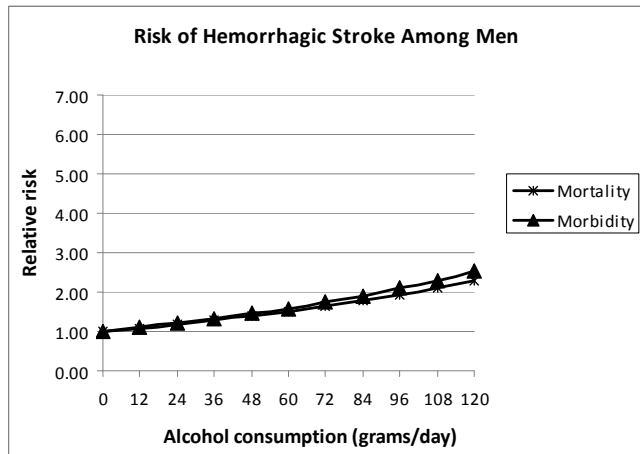

Mortality & Morbidity: Linear dose-response,  $f(\beta_1 x)$
